# Supplementary material for: Stereoselective synthesis of bicyclic lactones by annelation with functionalised orthoesters
Source: Royal Society of Chemistry journal article supplement (doi:10.1039/b600677a), 2006-01-01
Supplement: b600677a.pdf [file b600677a.pdf]

**Stereoselective synthesis of bicyclic lactones by annelation with  
functionalised orthoesters.**

*Nuno Maulide and István E. Markó\**

Université catholique de Louvain, Département de Chimie, Place Louis Pasteur 1, B-  
1348 Louvain-la-Neuve, Belgium.

**Electronic Supporting Information.**

**Instrumentation and procedures.**

Routine nuclear magnetic resonance (NMR) spectra were recorded on a VARIAN GEMINI-300 ( $^1\text{H}$  300MHz and  $^{13}\text{C}$  75MHz).  $^1\text{H}$  NMR chemical shifts ( $\delta_{\text{H}}$ ) are reported in ppm downfield from internal tetramethyl silane (TMS).  $^{13}\text{C}$  NMR spectra were recorded using  $\text{CDCl}_3$  as the internal standard. Splitting patterns in  $^1\text{H}$  spectra are designed as s, singlet; d, doublet; t, triplet; b, broad and m, multiplet.

Low resolution mass spectra (EI) were recorded using VARIAN MATT-44 and FINNIGAN MAT-TSQ 70 spectrometers.

Infra-red spectra (IR) were taken as thin films on a SHIMADZU spectrometer and recorded in  $\text{cm}^{-1}$ .

Thin layer chromatography (TLC) was performed on MERCK silica gel 60  $\text{F}_{254}$  aluminum-backed plates. The plates were visualised using 254 nm UV light and developed using an alkaline  $\text{KMnO}_4$  solution (1%  $\text{KMnO}_4$ / 5%  $\text{Na}_2\text{CO}_3$ ). Flash chromatography was performed using Rocc silica gel 60 (40-63  $\mu\text{m}$ ) under pressure with the stated solvents.

All solvents were routinely distilled prior to use. Reactions were performed under a dry, inert atmosphere of argon unless stated otherwise.

The following abbreviations are used: rt, room temperature; hr, hour; min, minute; mmol, millimole; mol, mole; mg, milligram; g, gram; mL, milliliter,  $\mu\text{L}$ , microliter.

## Typical experimental procedures.

### Condensation step: Preparation of 7c

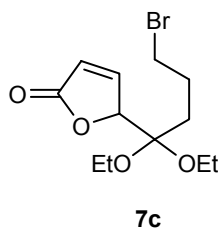

To a suspension of  $\text{ZnCl}_2$  (116 mg, 0.85 mmol, 0.7 eq.) in  $\text{CH}_2\text{Cl}_2$  (5 mL) at  $-78^\circ\text{C}$  are sequentially added with stirring orthoester **6c** (480 mg, 1.82 mmol, 1.5 eq.) and furan derivative **5a** (0.2 mL, 1.2 mmol, 1 eq.). The mixture is slowly warmed to rt and monitored by TLC. Upon completion, the reaction is quenched by adding 5 mL of a sat.  $\text{NaHCO}_3$  solution. The aqueous layer is repeatedly extracted with  $\text{CH}_2\text{Cl}_2$ , dried ( $\text{MgSO}_4$ ) and concentrated under reduced pressure. Purification by rapid flash chromatography (silica, PE/AcOEt 4:1) afforded **7c** (385 mg, 95%).

$^1\text{H}$  NMR (300 MHz,  $\text{CDCl}_3$ ):  $\delta$  7.54 (dd,  $J = 5.7, 1.8$  Hz, 1 H), 6.126 (dd,  $J = 5.7, 2.1$  Hz, 1 H), 5.08 (br s, 1 H), 3.61-3.22 (m, 6 H), 1.92-1.66 (m, 4 H), 1.24-1.11 (m, 6 H);  $^{13}\text{C}$  NMR (75 MHz,  $\text{CDCl}_3$ ):  $\delta$  172.7, 154.5, 122.0, 100.8, 84.0, 56.8, 56.7, 33.9, 27.2, 21.1, 15.5, 15.1; IR( $\text{cm}^{-1}$ ): 2975, 2362, 1759, 1732, 1596, 1443, 1375; MS (APCI+ev):  $m/z$  (%): 262 (100) [ $M\text{-OEt}$ ] $^+$ , 233 (50), 227 (25), 181 (20), 153 (20), 111 (15); HRMS (ES) calcd. for  $\text{C}_{12}\text{H}_{19}\text{O}_4\text{NaBr}$  ( $M\text{+Na}$ ): 329.0364; found 329.0363.

### Cyclisation step: Preparation of 8b

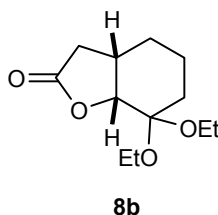

To a solution of **7c** (200 mg, 0.65 mmol, 1 eq.) in benzene (6.5 mL) were sequentially added in one portion TTMS (0.31 mL, 1.0 mmol, 1.5 eq) and AIBN (16 mg, 0.1 mmol, 0.15 eq.) and the mixture was refluxed for 2 hours. After cooling, removal of the solvent under reduced pressure and flash chromatography of the residue (silica, PE/AcOEt 6:1) afforded **8b** (130 mg, 88%).

$^1\text{H}$  NMR (300 MHz,  $\text{CDCl}_3$ ):  $\delta$  4.36 (d,  $J = 3.9$  Hz, 1 H), 3.60-3.45 (m, 4 H), 2.60-5.52 (m, 2 H), 2.34-2.28 (m, 1 H), 1.82-1.40 (m, 6 H), 1.23-1.17 (m, 6 H);  $^{13}\text{C}$  NMR (75 MHz,  $\text{CDCl}_3$ ):  $\delta$  176.7, 98.1, 79.9, 55.5, 55.4, 36.8, 35.0, 28.5, 26.6, 19.2, 15.3, 15.2; IR( $\text{cm}^{-1}$ ): 2972, 2927, 2854, 1786, 1662; MS (APCI+ev):  $m/z$  (%): 183 (100) [ $M\text{-OEt}$ ] $^+$ , 169 (25), 155 (35), 137 (15), 123 (15), 109 (20), 95 (30), 81 (12); Elemental analysis calcd. for  $\text{C}_{12}\text{H}_{20}\text{O}_4$ : C 63.18%; H 8.84%; found C 62.74%; H 8.86%.
